# Supplementary material
Source: publisher figshare collection journal article supplement (https://acs.figshare.com/ndownloader/files/5369702)
Supplement: Supplementary file 1 [file 5369702]

# Supporting Information

## Towards efficient thick active PTB7 photovoltaic layers using diphenyl ether as a solvent additive

Yifan Zheng<sup>†</sup>, Tenghooi Goh<sup>‡</sup>, Pu Fan<sup>†</sup>, Wei Shi<sup>†</sup>, Junsheng Yu<sup>\*†</sup>, and André D. Taylor<sup>\*‡</sup>

<sup>†</sup>State Key Laboratory of Electronic Thin Films and Integrated Devices, School of Optoelectronic Information, University of Electronic Science and Technology of China (UESTC), Chengdu 610054, P. R. China.

<sup>‡</sup>Department of Chemical and Environmental Engineering, Yale University, New Haven, Connecticut, 06511, United States

**KEYWORDS:** Diphenyl ether (DPE), Solvent additive, Organic photovoltaic (OPV), Thick active layer, Low-bandgap polymer

---

<sup>\*†</sup> E-mail: jsyu@uestc.edu.cn. Tel.: +86-28-83207157, Fax: +86-28-83206123.

<sup>\*‡</sup> E-mail: andre.taylor@yale.edu. Tel.: (203) 432-2217, Fax: (203) 432-4387.

**Table S1** Parameters employed for the fitting of the impedance spectra by use of an equivalent circuit model.

| Devices     | $R_1$<br>( $\Omega$ ) | CPE1-T<br>(F/cm <sup>2</sup> ) | CPE1-P | $R_2$<br>( $\Omega$ ) | $C_2$<br>(F)           | $\tau_{avg}$<br>( $\mu$ s) |
|-------------|-----------------------|--------------------------------|--------|-----------------------|------------------------|----------------------------|
| Without DPE | $1.07 \times 10^3$    | $4.2 \times 10^{-9}$           | 0.94   | $1.03 \times 10^6$    | $1.01 \times 10^{-9}$  | 4.5                        |
| DPE 2%      | $6.43 \times 10^3$    | $2.1 \times 10^{-9}$           | 0.87   | $9.10 \times 10^5$    | $1.17 \times 10^{-9}$  | 13.5                       |
| DPE 4%      | $1.55 \times 10^3$    | $2.4 \times 10^{-8}$           | 0.99   | $3.00 \times 10^5$    | $2.44 \times 10^{-12}$ | 37.1                       |
| DPE 5%      | $2.77 \times 10^3$    | $9.8 \times 10^{-9}$           | 0.98   | $3.06 \times 10^5$    | $3.19 \times 10^{-12}$ | 27.2                       |

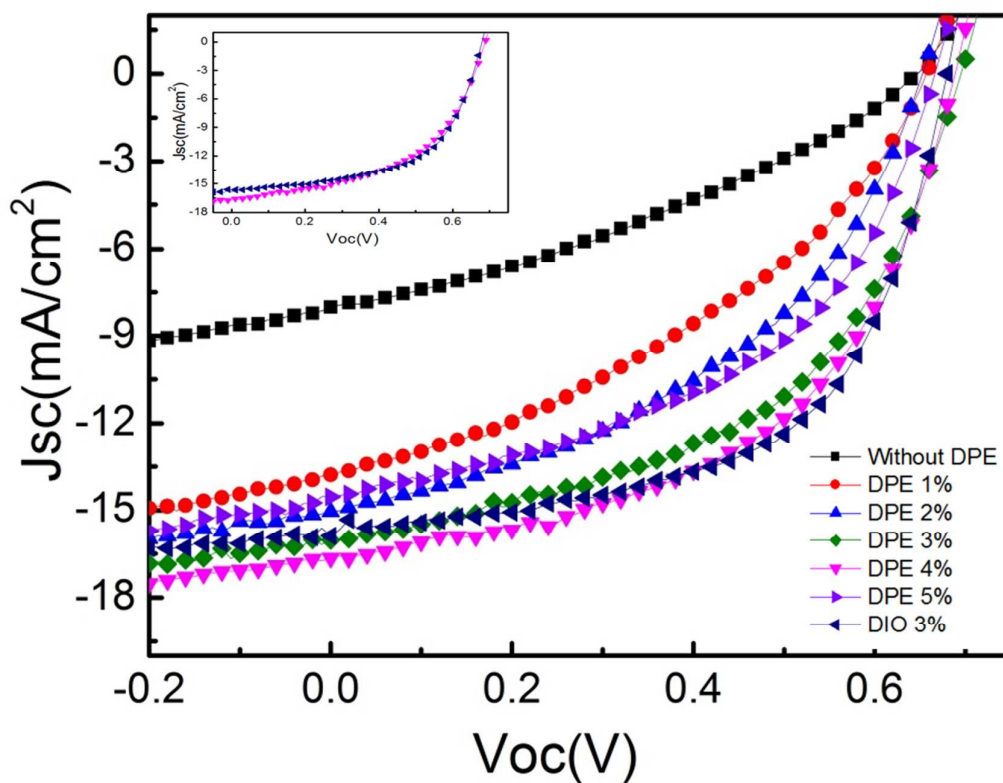

**Figure S1**  $J$ - $V$  characteristic curves of OPVs with different ratio of solvent additives; Inset: Comparison  $J$ - $V$  characteristic of the device with DIO 3% and DPE 4%.

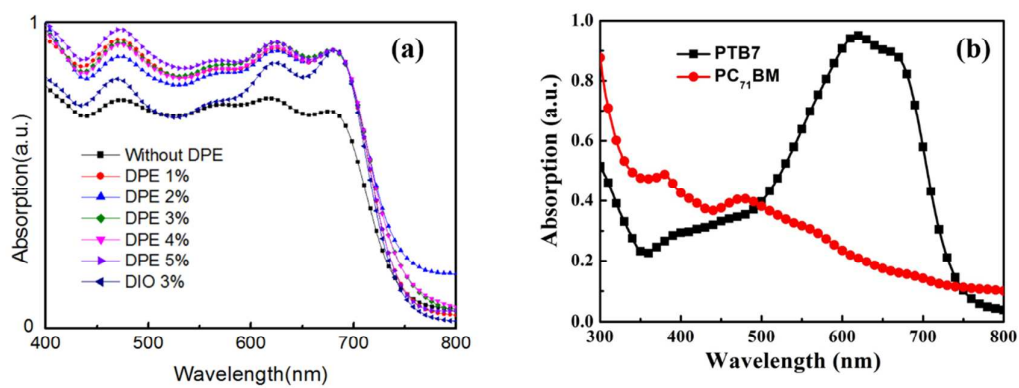

**Figure S2** UV-Vis absorption spectra of (a) the PTB7:PC<sub>71</sub>BM BHJ film with different solvent additive ratio and (b) the pure PTB7 and PCBM film.

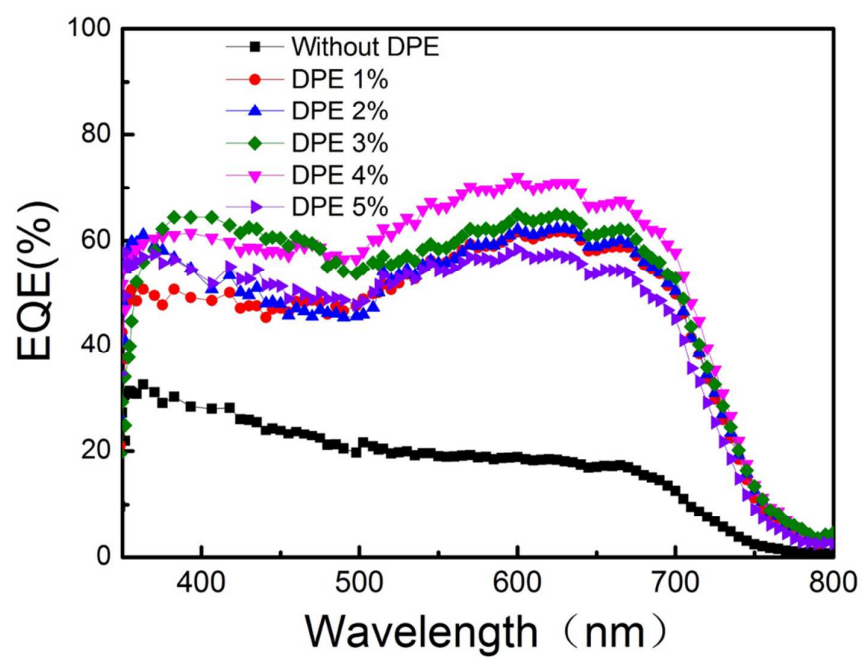

**Figure S3** External Quantum Efficiency (EQE) of device with variety ratio of DPE.

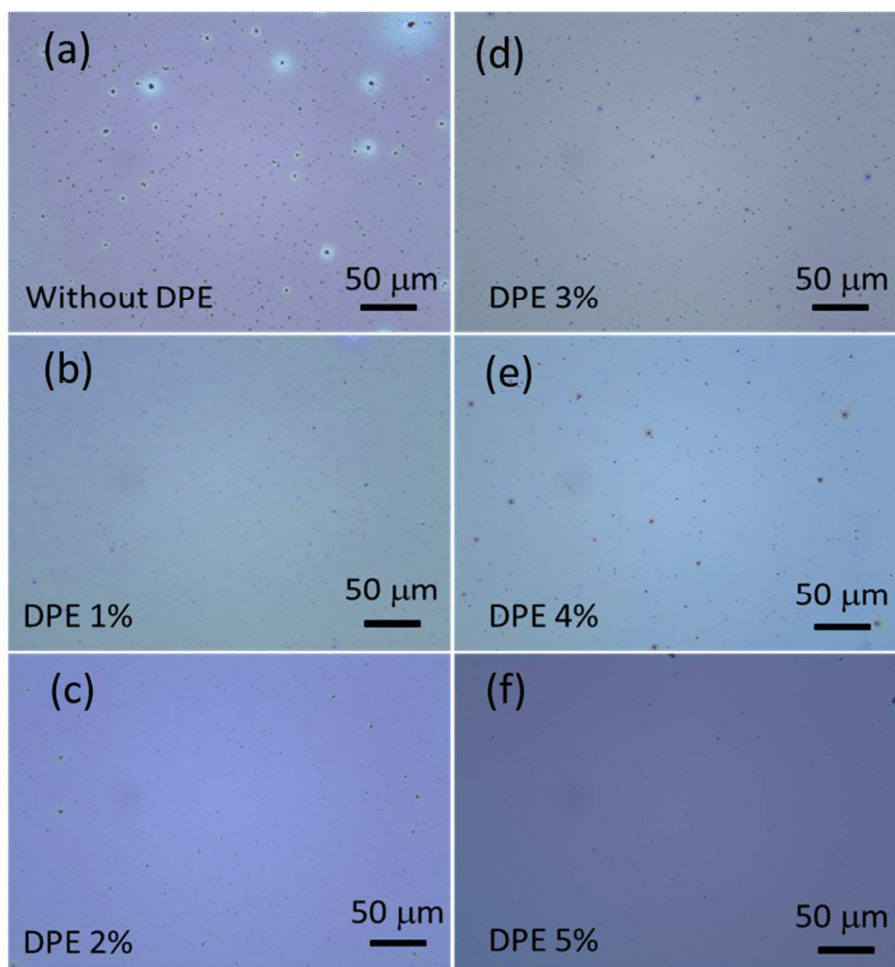

**Figure S4** Metallurgical Microscope image of PTB7:PC<sub>71</sub>BM BHJ blend film with variety concentrations of DPE, (a) without DPE, (b) DPE 1%, (c) DPE 2%, (d) DPE 3%, (e) DPE 4% and (f) DPE 5%.

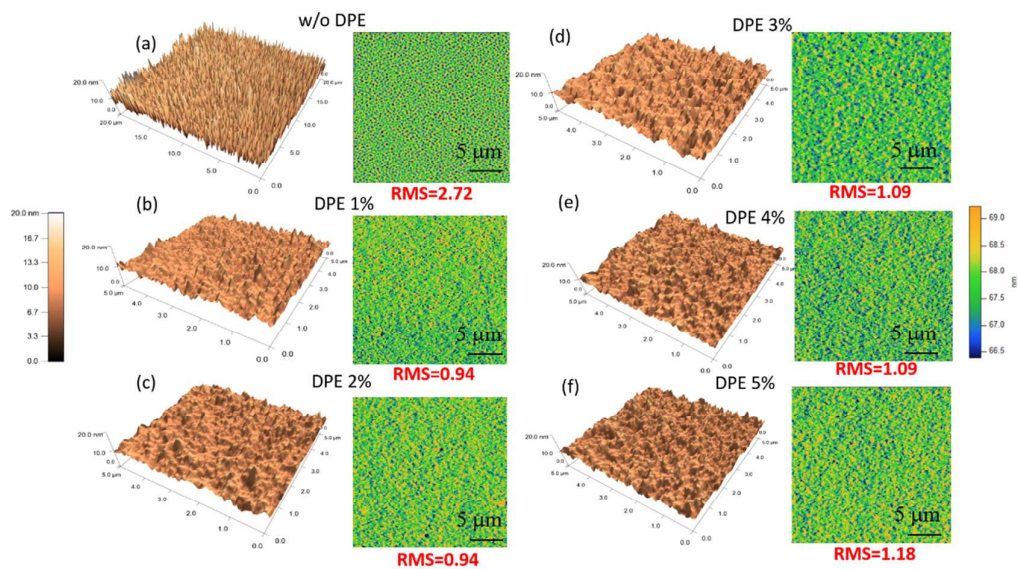

**Figure S5** AFM 3D exhibitions (left) and phase image (right) of PTB7:PC<sub>71</sub>BM BHJ blend films with different concentrations of DPE (a) without DPE, (b) DPE 1%, (c) DPE 2%, (d) DPE 3%, (e) DPE 4% and (f) DPE 5%.

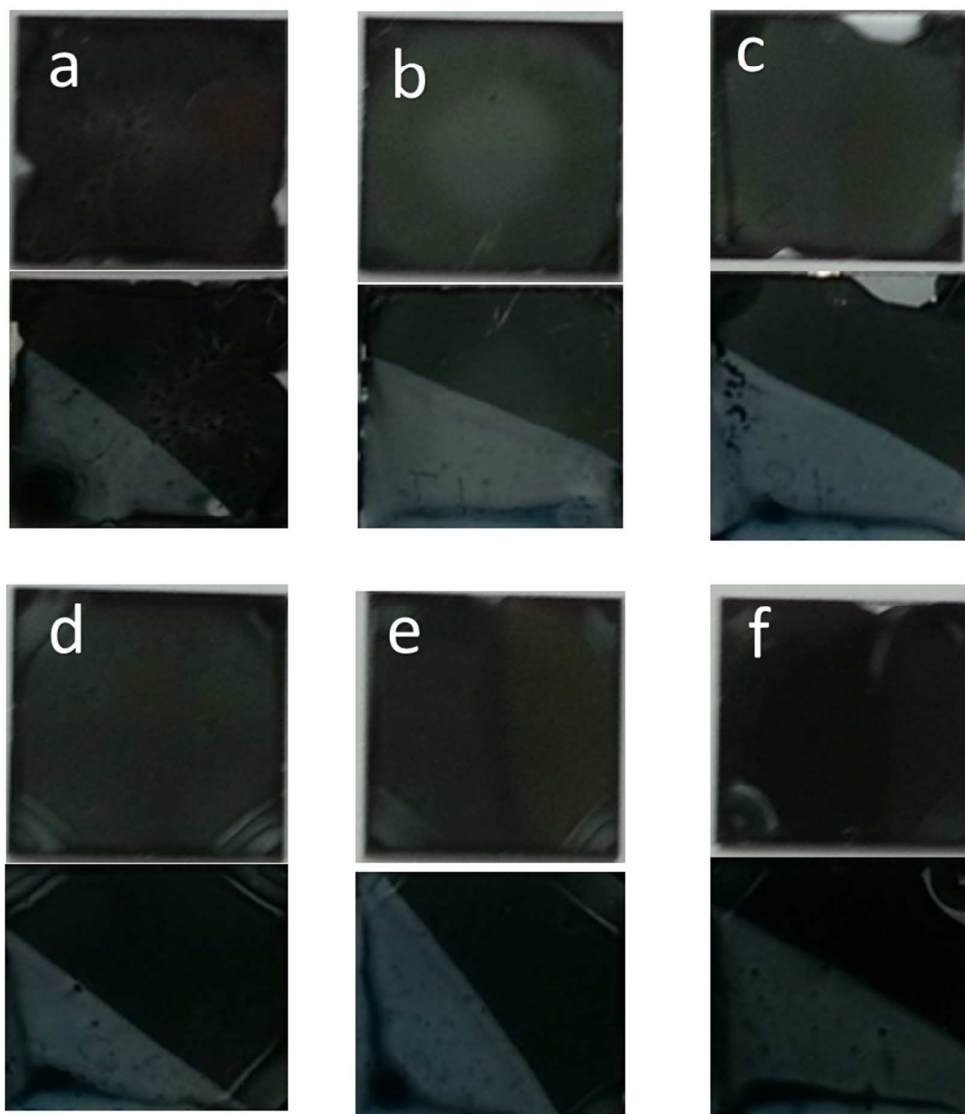

**Figure S6.** Image of the PTB7:PC<sub>71</sub>BM blend film added by different concentration of DPE (up) and the film washed by CB (down). (a) without DPE, (b) DPE 1%, (c) DPE 2%, (d) DPE 3%, (e) DPE 4% and (f) DPE 5%.



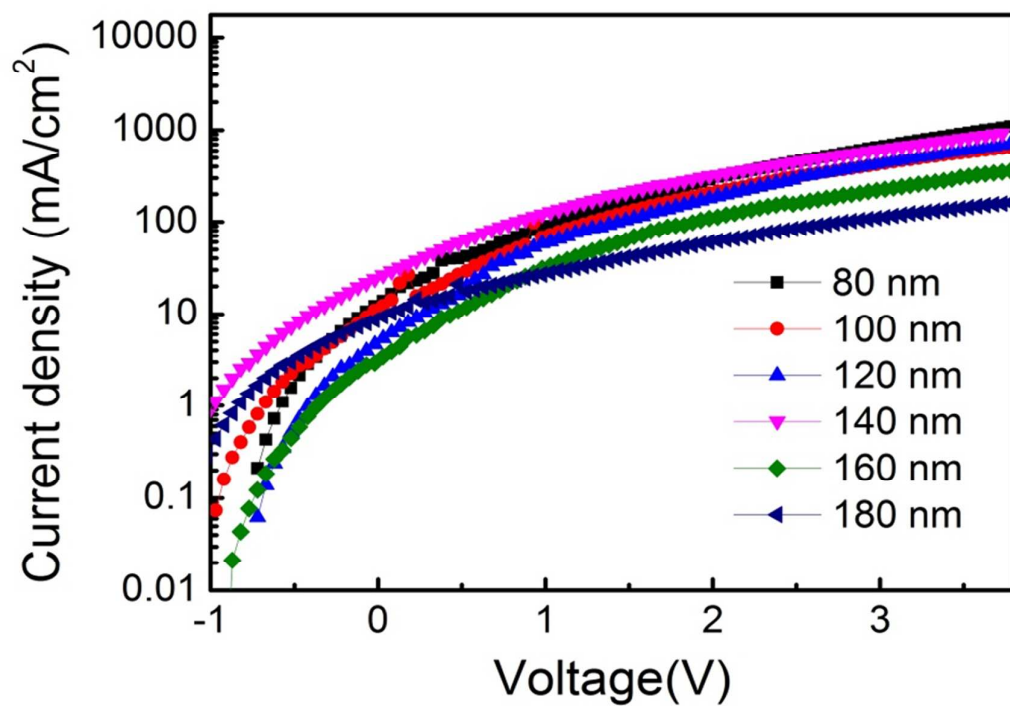

**Figure S7.**  $J$ - $V$  characteristics of hole-only devices with a configuration of ITO/MoO<sub>3</sub> (15 nm)/PTB7 : PC<sub>71</sub>BM (x nm) /MoO<sub>3</sub> (15 nm)/Ag (100 nm) based on 4% DPE

### **$J_{ph}$ Calculation**

To investigate the effect of DPE on device performance, photocurrent density ( $J_{ph}$ ) of OPVs is examined.  $J_{ph}$  is defined by  $J_{ph}=J_{light} - J_{dark}$ , where  $J_{light}$  and  $J_{dark}$  represent the experimental current density measured in illumination and dark conditions, respectively.<sup>1</sup>  $J_{ph}$  can be analyzed using Equation as the analytical solution as suggested Sokel and Hughes.<sup>2</sup>

$$J_{ph} = eGL \left[ \frac{\exp(eV / kT) + 1}{\exp(eV / kT) - 1} - \frac{2kT}{eV} \right]$$

where  $e$  is the element charge,  $G$  is the charge carrier generation rate, and  $L$  is the thickness of the active layer.  $k$  is the Boltzmann constant, and  $T$  is the room temperature.  $G$  is described by a relation of  $G(T, E)=G_{max}P(T, E)$ , where  $G_{max}$  represents the total number of photogenerated charge transfer (CT), and  $P(T, E)$  is the probability for CT dissociation at the donor-acceptor interface.<sup>3</sup>

We tabulate  $J_{ph}$  of the thin PTB7:PC<sub>71</sub>BM devices with DPE additive in Table 1. OPV based on DPE 4% shows the highest  $J_{ph}$ , indicating a large number of generation of CT states as well as high CT separation efficiency.<sup>4-6</sup>

### **References**

1. Guan, Z.; Yu, J.; Huang, J.; Zhang, L., Power Efficiency Enhancement Of Solution-Processed Small-Molecule Solar Cells Based On Squaraine Via Thermal Annealing And Solvent Additive Methods. *Sol. Energy Mater. Sol. Cells* **2013**, *109*, 262-269.
2. Sokel, R.; Hughes, R., Numerical Analysis Of Transient Photoconductivity In Insulators. *J. Appl. Phys.* **1982**, *53* (11), 7414-7424.
3. Sariciftci, N.; Hebger, A., Reversible, metastable, Ultrafast Photoinduced Electron Transfer From Semiconducting Polymers To Buckminsterfullerene And In The Corresponding Donor/Acceptor Heterojunctions. *Int. J. Mod. Phys. B* **1994**, *8* (03), 237-274.

4. Yu, J.; Zheng, Y.; Huang, J., Towards High Performance Organic Photovoltaic Cells: A Review Of Recent Development In Organic Photovoltaics. *Polymers* **2014**, *6* (9), 2473-2509.
5. Zheng, Y.; Li, S.; Zheng, D.; Yu, J., Effects Of Different Polar Solvents For Solvent Vapor Annealing Treatment On The Performance Of Polymer Solar Cells. *Org. electron.* **2014**, *15* (11), 2647-2653.
6. Vandewal, K.; Albrecht, S.; Hoke, E. T.; Graham, K. R.; Widmer, J.; Douglas, J. D.; Schubert, M.; Mateker, W. R.; Bloking, J. T.; Burkhard, G. F., Efficient Charge Generation By Relaxed Charge-Transfer States At Organic Interfaces. *Nature Mater.* **2014**, *13* (1), 63-68.
